# Supplementary material
Source: bioRxiv or medRxiv preprint supplement (https://www.biorxiv.org/highwire/filestream/108602/field_highwire_adjunct_files/30/178806-37.pdf)
Supplement: Supplementary file [file 178806-37.pdf]

| <b>IDP Group name</b>  | <b>Description</b>                                                                                                                                                                       | <b>Number of IDPs</b> | <b>Number of complete samples (subjects)</b> |
|------------------------|------------------------------------------------------------------------------------------------------------------------------------------------------------------------------------------|-----------------------|----------------------------------------------|
| <b>T1-SIENAX</b>       | White, grey and cerebrospinal fluid (CSF) volumes                                                                                                                                        | 10                    | 8,428                                        |
| <b>T1-FIRST</b>        | 7 Sub-cortical volumes x3 (left, right and left+right); brain-stem volume                                                                                                                | 22                    | 8,428                                        |
| <b>T1-FAST_ROIs</b>    | Grey matter partial volume summed in 139 regions of interest (ROIs)                                                                                                                      | 139                   | 8,427                                        |
| <b>T2-FLAIR-BIANCA</b> | Total white matter hyperintensity volume                                                                                                                                                 | 1                     | 7,705                                        |
| <b>SWI-T2*</b>         | T2* signal intensity in 7 distinct subcortical structures x 3 (left, right and left+right)                                                                                               | 21                    | 7,778                                        |
| <b>FreeSurfer</b>      | Cortical areas and thicknesses based on 2 different cortical atlases; subcortical volumes                                                                                                | 483                   | 8,411                                        |
| <b>dMRI</b>            | 6 Diffusion tensor and 3 microstructure modelling measures, on each of 75 white matter tract regions                                                                                     | 675                   | 7,532                                        |
| <b>tfMRI</b>           | Signal strength in task activated regions                                                                                                                                                | 16                    | 7,612                                        |
| <b>rfMRI</b>           | Resting state fluctuation amplitudes in regions from two functional parcellations, and functional network connectivity between all pairs of regions + ICA dimension reduced connectivity | 1,777                 | 7,916                                        |

**Supplementary Table 12: Imaging derived phenotype (IDP) grouping.** This table shows the 3,144 IDPs grouped according to modality and missing data patterns.
